# Supplementary material for: Risk of Appendicitis among Children with Different Piped Water Supply: A Nationwide Population-Based Study
Source: MDPI journal article supplement (doi:10.3390/ijerph15081601), 2018-07-28
Supplement: s1 [file s1]

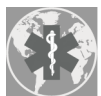

## Supplementary Materials

# Evaluation the effect of piped water supply on pediatric appendicitis: a nationwide cohort study

Hao-Ming Li, Shi-Zuo Liu, Ying-Kai Huang, Yuan-Chih Su, and  
Chia-Hung Kao

**Table S1.** Piped water prevalence in Taiwan during 1996-2010

| Area \ Year                       | 1996         | 1997         | 1998         | 1999         | 2000         | 2001         | 2002         | 2003         | 2004         | 2005         | 2006         | 2007         | 2008         | 2009         | 2010         |
|-----------------------------------|--------------|--------------|--------------|--------------|--------------|--------------|--------------|--------------|--------------|--------------|--------------|--------------|--------------|--------------|--------------|
| <b>Northern Region</b>            | 93.10        | 93.90        | 94.80        | 95.20        | 95.40        | 95.19        | 95.33        | 95.39        | 95.59        | 95.91        | 96.16        | 96.34        | 96.42        | 96.38        | 96.38        |
| <b>Taipei City<sup>#</sup></b>    | <b>99.40</b> | <b>99.45</b> | <b>99.46</b> | <b>99.48</b> | <b>99.48</b> | <b>99.48</b> | <b>99.56</b> | <b>99.57</b> | <b>99.58</b> | <b>99.58</b> | <b>99.60</b> | <b>99.60</b> | <b>99.62</b> | <b>99.62</b> | <b>99.62</b> |
| Taipei County                     | 95.10        | 95.11        | 96.07        | 96.33        | 96.52        | 96.68        | 96.69        | 96.87        | 96.93        | 97.09        | 97.16        | 97.21        | 97.25        | 97.29        | 97.29        |
| Keelung City                      | 98.37        | 98.53        | 98.66        | 98.72        | 98.38        | 98.51        | 98.97        | 99.22        | 99.23        | 99.28        | 99.31        | 99.34        | 99.36        | 99.31        | 99.31        |
| Taoyuan County                    | 88.80        | 90.87        | 92.33        | 93.66        | 93.89        | 92.46        | 93.01        | 92.69        | 93.20        | 93.69        | 94.65        | 95.15        | 95.11        | 94.67        | 94.67        |
| Hsinchu City                      | 94.73        | 96.12        | 96.47        | 96.78        | 97.05        | 96.81        | 96.36        | 97.20        | 97.93        | 97.76        | 97.65        | 98.21        | 98.82        | 98.84        | 98.84        |
| <b>Hsinchu County<sup>*</sup></b> | <b>61.20</b> | <b>67.12</b> | <b>69.16</b> | <b>70.18</b> | <b>71.77</b> | <b>71.70</b> | <b>71.86</b> | <b>72.49</b> | <b>73.39</b> | <b>76.62</b> | <b>76.68</b> | <b>77.82</b> | <b>78.76</b> | <b>79.31</b> | <b>79.31</b> |
| Yilan County                      | 81.50        | 83.11        | 86.46        | 87.67        | 87.97        | 88.21        | 88.49        | 88.59        | 89.18        | 90.16        | 91.15        | 91.32        | 91.60        | 92.11        | 92.11        |
| <b>Central Region</b>             | <b>85.70</b> | <b>86.40</b> | <b>86.50</b> | <b>86.70</b> | <b>86.80</b> | <b>87.19</b> | <b>87.63</b> | <b>87.81</b> | <b>88.40</b> | <b>88.73</b> | <b>89.09</b> | <b>89.39</b> | <b>89.47</b> | <b>89.48</b> | <b>89.48</b> |
| <b>Miaoli County<sup>*</sup></b>  | <b>65.15</b> | <b>67.03</b> | <b>67.34</b> | <b>68.94</b> | <b>69.80</b> | <b>70.29</b> | <b>70.91</b> | <b>72.29</b> | <b>73.24</b> | <b>73.91</b> | <b>74.60</b> | <b>75.22</b> | <b>75.33</b> | <b>75.43</b> | <b>75.43</b> |
| <b>Taichung City<sup>#</sup></b>  | <b>97.03</b> | <b>97.20</b> | <b>97.24</b> | <b>97.30</b> | <b>97.27</b> | <b>97.34</b> | <b>98.57</b> | <b>99.03</b> | <b>99.05</b> | <b>99.06</b> | <b>99.14</b> | <b>99.18</b> | <b>99.22</b> | <b>99.26</b> | <b>99.26</b> |
| Taichung County                   | 81.70        | 82.28        | 82.98        | 82.36        | 82.34        | 83.16        | 83.65        | 84.13        | 85.14        | 85.83        | 86.54        | 87.01        | 87.20        | 87.24        | 87.24        |
| Nantou County                     | 79.60        | 79.21        | 79.43        | 77.45        | 77.29        | 77.31        | 77.75        | 78.18        | 78.59        | 78.70        | 78.92        | 79.18        | 78.84        | 78.53        | 78.53        |
| Changhua County                   | 88.40        | 89.22        | 89.31        | 90.50        | 90.59        | 91.07        | 90.96        | 90.71        | 91.18        | 91.58        | 91.95        | 92.30        | 92.32        | 92.31        | 92.31        |
| Yunlin County                     | 92.89        | 95.10        | 95.19        | 95.19        | 95.19        | 94.98        | 94.96        | 93.72        | 94.15        | 93.79        | 93.54        | 93.40        | 93.57        | 93.60        | 93.60        |
| <b>Southern Region</b>            | <b>86.70</b> | <b>87.00</b> | <b>87.10</b> | <b>87.30</b> | <b>87.40</b> | <b>87.55</b> | <b>87.84</b> | <b>87.93</b> | <b>88.33</b> | <b>88.57</b> | <b>88.66</b> | <b>88.64</b> | <b>88.93</b> | <b>88.96</b> | <b>88.96</b> |
| Chiayi City                       | 97.30        | 98.62        | 98.98        | 99.00        | 99.03        | 99.05        | 99.07        | 98.98        | 99.44        | 99.46        | 99.51        | 99.58        | 99.66        | 99.69        | 99.69        |
| Chiayi County                     | 86.29        | 88.35        | 88.38        | 88.39        | 88.42        | 88.41        | 88.51        | 87.98        | 88.46        | 88.99        | 89.07        | 89.02        | 88.93        | 88.99        | 88.99        |
| <b>Tainan City<sup>#</sup></b>    | <b>99.88</b> | <b>99.88</b> | <b>99.88</b> | <b>99.88</b> | <b>99.88</b> | <b>99.88</b> | <b>99.88</b> | <b>99.88</b> | <b>99.90</b> | <b>99.90</b> | <b>99.88</b> | <b>99.88</b> | <b>99.88</b> | <b>99.88</b> | <b>99.88</b> |
| Tainan County                     | 97.68        | 96.83        | 97.06        | 97.13        | 97.12        | 97.42        | 97.76        | 97.75        | 97.78        | 97.79        | 97.80        | 97.92        | 97.95        | 98.01        | 98.01        |
| Kaohsiung City                    | 97.28        | 95.95        | 98.15        | 98.09        | 98.23        | 98.61        | 98.86        | 98.89        | 98.93        | 98.96        | 99.00        | 99.04        | 99.06        | 99.07        | 99.07        |

|                         |              |              |              |              |              |              |              |              |              |              |              |              |              |              |   |
|-------------------------|--------------|--------------|--------------|--------------|--------------|--------------|--------------|--------------|--------------|--------------|--------------|--------------|--------------|--------------|---|
| Kaohsiung County        | 88.54        | 88.62        | 88.63        | 88.62        | 88.51        | 88.48        | 88.69        | 88.87        | 89.62        | 90.20        | 90.08        | 90.03        | 90.19        | 90.26        | 9 |
| <b>Pingtung County*</b> | <b>38.14</b> | <b>38.49</b> | <b>40.89</b> | <b>41.55</b> | <b>41.69</b> | <b>41.67</b> | <b>42.07</b> | <b>42.67</b> | <b>43.66</b> | <b>44.02</b> | <b>44.28</b> | <b>43.67</b> | <b>45.13</b> | <b>44.98</b> | 4 |
| <b>Eastern Region</b>   | <b>76.00</b> | <b>77.00</b> | <b>77.70</b> | <b>78.30</b> | <b>78.60</b> | <b>78.65</b> | <b>78.43</b> | <b>78.91</b> | <b>79.48</b> | <b>80.16</b> | <b>80.55</b> | <b>80.75</b> | <b>81.09</b> | <b>81.12</b> | 8 |
| Hualien County          | 76.40        | 77.93        | 78.91        | 79.90        | 80.45        | 80.46        | 80.32        | 81.13        | 81.63        | 82.22        | 82.55        | 82.69        | 82.93        | 82.97        | 8 |
| Taitung County          | 75.22        | 75.73        | 75.86        | 75.96        | 75.97        | 76.04        | 75.69        | 75.70        | 76.37        | 77.17        | 77.62        | 77.90        | 78.38        | 78.40        | 7 |

\* city/county in study group

# city/county in control group

**Table S2.** The ICD-9 codes for disease identification

| Disease                    | ICD-9 codes                                                       |
|----------------------------|-------------------------------------------------------------------|
| Appendicitis               | 540-543                                                           |
| - perforated appendicitis  | 540.0, 540.1                                                      |
| Congenital disorder        | 243, 250, 255.2, 270-273, 275, 277, 279, 343, 344, 740-759, V13.6 |
| Gastrointestinal disorder  | 530-579                                                           |
| Infectious Diseases        | 001-139                                                           |
| Inflammatory bowel disease | 555,556                                                           |
| Low birth weight           | 765, V213                                                         |
| Malignancy                 | 140-208                                                           |
| Nutritional deficiency     | 260-269                                                           |
| Perinatal disorder         | 760-779, V137                                                     |

ICD-9-CM = International Classification of Diseases, Ninth Revision, Clinical Modification

## Sensitivity analysis

**Table S3.** Baseline characteristics in the study and alternative control cohorts – Sensitivity analysis

| Characteristics        | Alternative control, n(%) | Study, n(%)  | SMD   |
|------------------------|---------------------------|--------------|-------|
| <b>Sex</b>             |                           |              | 0.001 |
| Female                 | 56321 (48.2)              | 56325 (48.2) |       |
| Male                   | 60453 (51.8)              | 60449 (51.8) |       |
| <b>Birth year</b>      |                           |              |       |
| 1996-2000              | 51213 (43.9)              | 51870 (44.4) | 0.011 |
| 2001-2005              | 38652 (33.1)              | 38518 (33)   | 0.002 |
| 2006-2010              | 26909 (23)                | 26386 (22.6) | 0.011 |
| <b>Geographic area</b> |                           |              | 0.00  |
| North                  | 35965 (30.8)              | 35965 (30.8) |       |
| Central                | 35196 (30.1)              | 35196 (30.1) |       |

|                                            |              |              |       |
|--------------------------------------------|--------------|--------------|-------|
| South                                      | 45613 (39.1) | 45613 (39.1) |       |
| <b>Low income</b>                          | 573 (0.5)    | 659 (0.6)    | 0.01  |
| <b>Comorbidity</b>                         |              |              |       |
| Gastrointestinal disorder                  | 36551 (31.3) | 36158 (31)   | 0.015 |
| Infectious Diseases                        | 14009 (12)   | 13441 (11.5) | 0.007 |
| Perinatal disorder                         | 9734 (8.3)   | 9618 (8.2)   | 0.004 |
| Low birth weight or nutritional deficiency | 1113 (1)     | 809 (0.7)    | 0.029 |
| Follow-up years, mean(SD)                  | 10.1 (4.18)  | 10.1 (4.18)  |       |

Abbreviation: SD, standard deviation; SMD, Standardized mean difference.

**Table S4.** Comparing the incidence and HR of appendicitis between the study and alternative control cohorts – Sensivity analysis

| Variable                       | Alternative Control |         |                   | Study cohort       |         |                   | Compared with Control |                                   |
|--------------------------------|---------------------|---------|-------------------|--------------------|---------|-------------------|-----------------------|-----------------------------------|
|                                | Event <sup>a</sup>  | PY      | Rate <sup>#</sup> | Event <sup>a</sup> | PY      | Rate <sup>#</sup> | Crude HR (95% CI)     | Adjusted HR (95% CI) <sup>†</sup> |
| <b>Total appendicitis</b>      | 998                 | 1173983 | 8.5               | 1472               | 1176899 | 12.51             | 1.47(1.36-1.59)***    | 1.47(1.35-1.59)***                |
| <b>Perforated appendicitis</b> | 244                 | 1173983 | 2.08              | 338                | 1176899 | 2.87              | 1.38(1.17-1.63)***    | 1.38(1.17-1.63)***                |
| <b>Sex</b>                     |                     |         |                   |                    |         |                   |                       |                                   |
| Female                         | 395                 | 567001  | 6.97              | 608                | 568271  | 10.7              | 1.53(1.35-1.74)***    | 1.53(1.35-1.74)***                |
| Male                           | 603                 | 606982  | 9.93              | 864                | 608628  | 14.2              | 1.43(1.29-1.58)***    | 1.42(1.28-1.58)***                |
| <b>Birth year</b>              |                     |         |                   |                    |         |                   |                       |                                   |
| 1996-2000                      | 708                 | 709868  | 9.97              | 1120               | 716659  | 15.63             | 1.57(1.43-1.72)***    | 1.57(1.43-1.72)***                |
| 2001-2005                      | 248                 | 349636  | 7.09              | 317                | 347885  | 9.11              | 1.29(1.09-1.52)**     | 1.28(1.09-1.52)**                 |
| 2006-2010                      | 42                  | 114479  | 3.67              | 35                 | 112355  | 3.12              | 0.85(0.54-1.33)       | 0.85(0.54-1.33)                   |
| <b>Geographic region</b>       |                     |         |                   |                    |         |                   |                       |                                   |
| North                          | 250                 | 351325  | 7.12              | 293                | 350657  | 8.36              | 1.17(0.99-1.39)       | 1.17(0.99-1.39)                   |
| Central                        | 313                 | 351337  | 8.91              | 507                | 350393  | 14.47             | 1.63(1.41-1.87)***    | 1.63(1.41-1.87)***                |
| South                          | 435                 | 471322  | 9.23              | 672                | 475848  | 14.12             | 1.53(1.35-1.72)***    | 1.52(1.35-1.72)***                |
| <b>Low income</b>              |                     |         |                   |                    |         |                   |                       |                                   |
| No                             | 997                 | 1170982 | 8.51              | 1470               | 1172960 | 12.53             | 1.47(1.36-1.59)***    | 1.47(1.36-1.59)***                |
| Yes                            | 1                   | 3001    | 3.33              | 2                  | 3939    | 5.08              | 1.17(0.11-12.94)      | 0.88(0.08-10.04)                  |
| <b>Comorbidity</b>             |                     |         |                   |                    |         |                   |                       |                                   |
| No                             | 627                 | 748896  | 8.37              | 1005               | 756412  | 13.29             | 1.59(1.44-1.75)***    | 1.58(1.43-1.75)***                |
| Yes                            | 371                 | 425087  | 8.73              | 467                | 420487  | 11.11             | 1.27(1.11-1.46)***    | 1.27(1.11-1.46)***                |

Abbreviation: PY, person-years; HR, hazard ratio; CI, confidence interval

<sup>a</sup> Primary event: appendicitis (ICD-9 540-543); perforated appendicitis event assessed as (ICD-9 540.0, 540.1)

<sup>†</sup> Adjusted for sex, birth year, geographic region, low income and comorbidities

\* p < 0.05; \*\* p < 0.01; \*\*\* p < 0.001; # Incidence rates, per 10,000 person-years

**Table S5.** Multivariate analysis of appendicitis risk factors – Sensivity analysis

| Risk factors                               | aHR <sup>†</sup> | 95% CI      | p-value |
|--------------------------------------------|------------------|-------------|---------|
| <b>Tap water prevalence(low vs high)</b>   | 1.47             | (1.35-1.59) | <0.001  |
| <b>Sex(Male vs Female)</b>                 | 1.36             | (1.26-1.48) | <0.001  |
| <b>Birth year</b>                          |                  |             |         |
| 1996-2000                                  | 1.00             | (Reference) |         |
| 2001-2005                                  | 0.75             | (0.68-0.84) | <0.001  |
| 2006-2010                                  | 0.56             | (0.44-0.72) | <0.001  |
| <b>Geographic area</b>                     |                  |             |         |
| North                                      | 1.00             | (Reference) |         |
| Central                                    | 1.5              | (1.34-1.67) | <0.001  |
| South                                      | 1.45             | (1.31-1.61) | <0.001  |
| <b>Low Income (Yes vs No)</b>              | 0.63             | (0.2-1.97)  | 0.43    |
| <b>Comorbidity</b>                         |                  |             |         |
| Gastrointestinal disorder(Yes vs No)       | 0.98             | (0.89-1.09) | 0.74    |
| Infectious Diseases(Yes vs No)             | 1.12             | (0.98-1.29) | 0.10    |
| Perinatal disorder                         | 1.19             | (1.04-1.36) | 0.01    |
| Low birth weight or nutritional deficiency | 0.95             | (0.61-1.46) | 0.80    |

Abbreviation: aHR, adjusted hazard ratio; CI, confidence interval

<sup>†</sup> Adjusted for sex, birth year, geographic region, low income, and comorbidities

**Table S6.** Average water quality in Taiwan during 2002-2011.

| Test Items             | Unit      | piped   | river    | underground |
|------------------------|-----------|---------|----------|-------------|
| Coliform               | CFU/100mL | <1      | 1527760  | NT          |
| Free Chlorine Residual | mg/L      | 0.5051  | NT       | NT          |
| Ammonia                | mg/L      | 0.0004  | 3.5220   | 1.0491      |
| Chloride               | mg/L      | 3.7006  | 556.4699 | 617.9895    |
| Nitrate                | mg/L      | 0.6723  | 0.4073   | 2.1456      |
| Sulfate                | mg/L      | 9.7825  | NT       | 158.8795    |
| Arsenic                | mg/L      | <0.0001 | 0.0011   | 0.0067      |
| Cadmium                | mg/L      | <0.0001 | 0.0004   | 0.0002      |
| Chromium               | mg/L      | <0.0001 | 0.0017   | 0.0015      |
| Copper                 | mg/L      | 0.0027  | 0.0145   | 0.0028      |
| Iron                   | mg/L      | 0.0036  | NT       | 1.6571      |
| Lead                   | mg/L      | 0.0001  | 0.0048   | 0.0032      |
| Manganese              | mg/L      | 0.0010  | 0.0631   | 0.5421      |
| Mercury                | mg/L      | <0.0001 | 0.0001   | <0.0001     |
| Nickel                 | mg/L      | <0.0001 | NT       | 0.0002      |
| Selenium               | mg/L      | <0.0001 | 0.0011   | 0.0011      |
| Zinc                   | mg/L      | 0.0010  | 0.0492   | 0.0206      |
| Total Hardness         | mg/L      | 90.094  | NT       | 470.5593    |
| Total Dissolved Solids | mg/L      | 43.129  | 162.1453 | 1601.4373   |

NT: not tested

STROBE checklist of items that should be included in reports of observational studies

|                           | <b>Item No.</b> | <b>Recommendation</b>                                                                                                           | <b>Page No.</b> | <b>Relevant text from manuscript</b>                                                                                                                                                                                                                                                                                                                                                                                                                                                                                                                                                                                                                                                                |
|---------------------------|-----------------|---------------------------------------------------------------------------------------------------------------------------------|-----------------|-----------------------------------------------------------------------------------------------------------------------------------------------------------------------------------------------------------------------------------------------------------------------------------------------------------------------------------------------------------------------------------------------------------------------------------------------------------------------------------------------------------------------------------------------------------------------------------------------------------------------------------------------------------------------------------------------------|
| <b>Title and abstract</b> | 1               | (a) Indicate the study's design with a commonly used term in the title or the abstract                                          | 1               | This longitudinal, nationwide, cohort study                                                                                                                                                                                                                                                                                                                                                                                                                                                                                                                                                                                                                                                         |
|                           |                 | (b) Provide in the abstract an informative and balanced summary of what was done and what was found                             | 1               | Children with low piped water supply were at an increased risk of appendicitis                                                                                                                                                                                                                                                                                                                                                                                                                                                                                                                                                                                                                      |
| <b>Introduction</b>       |                 |                                                                                                                                 |                 |                                                                                                                                                                                                                                                                                                                                                                                                                                                                                                                                                                                                                                                                                                     |
| Background/rationale      | 2               | Explain the scientific background and rationale for the investigation being reported                                            | 2               | The effect of piped water supply on pediatric appendicitis remains uncertain                                                                                                                                                                                                                                                                                                                                                                                                                                                                                                                                                                                                                        |
| Objectives                | 3               | State specific objectives, including any prespecified hypotheses                                                                | 2               | we hypothesized that piped water availability in children was associated with the incidence of appendicitis, and conducted a longitudinal, nationwide cohort study to compare the risk of appendicitis among children with different levels of piped water supply.                                                                                                                                                                                                                                                                                                                                                                                                                                  |
| <b>Methods</b>            |                 |                                                                                                                                 |                 |                                                                                                                                                                                                                                                                                                                                                                                                                                                                                                                                                                                                                                                                                                     |
| Study design              | 4               | Present key elements of study design early in the paper                                                                         | 2               | This retrospective cohort study uses Taiwan National Health Insurance (TNHI) database to assess the health outcomes of participants, and statistical data from Taiwan Water Resources Agency (TWRA) for the exposure of piped water supply.                                                                                                                                                                                                                                                                                                                                                                                                                                                         |
| Setting                   | 5               | Describe the setting, locations, and relevant dates, including periods of recruitment, exposure, follow-up, and data collection | 2,3             | From the TNHI database, we identified children born in 1996-2010 with residential areas of Hsinchu County, Miaoli County, and Pingtung County as the study group, who had the lowest piped water supply. The control group consisted of children born in 1996-2010 with residential areas of Taipei city, Taichung City, and Tainan City, who had the highest piped water supply. The index date (the start of follow-up) of each participant was six months after their birthday when most infants were less breastfed and expected to increase water intake. All participants were followed from their index date until the first date of outcome, death or the end of 2012 without missing data. |
| Participants              | 6               | (a) <i>Cohort study</i> —Give the eligibility criteria, and the sources and methods of selection of participants.               | 3-4             | From the TNHI database, we identified children born in 1996-2010 with residential areas of Hsinchu County, Miaoli County, and Pingtung County as the study group, who had the lowest piped water supply. The control group consisted of children born in 1996-2010 with residential areas of Taipei city, Taichung City, and Tainan City, who had the highest piped water supply. Exclusion criteria were: (i) appendicitis, congenital disorder and inflammatory bowel disease before index date; (ii) hospitalization on index date or hospitalized days before index date > 14 days.                                                                                                             |

|                              |    |                                                                                                                                                                                      |     |                                                                                                                                                                                                                                                                                                                                                                                                                                                                                                                                                                                                                                                                                                                                                                                                                                                                                                                                                                                                                       |
|------------------------------|----|--------------------------------------------------------------------------------------------------------------------------------------------------------------------------------------|-----|-----------------------------------------------------------------------------------------------------------------------------------------------------------------------------------------------------------------------------------------------------------------------------------------------------------------------------------------------------------------------------------------------------------------------------------------------------------------------------------------------------------------------------------------------------------------------------------------------------------------------------------------------------------------------------------------------------------------------------------------------------------------------------------------------------------------------------------------------------------------------------------------------------------------------------------------------------------------------------------------------------------------------|
|                              |    | (b) Cohort study—For matched studies, give matching criteria and number of exposed and unexposed                                                                                     | 4   | both cohorts were 1:1 propensity-score matched by sex, age, birthday, geographic region, low-income status and all comorbidities.                                                                                                                                                                                                                                                                                                                                                                                                                                                                                                                                                                                                                                                                                                                                                                                                                                                                                     |
| Variables                    | 7  | Clearly define all outcomes, exposures, predictors, potential confounders, and effect modifiers. Give diagnostic criteria, if applicable                                             | 4   | The primary outcome was hospitalized appendicitis with a discharge ICD-9 code of 540-543 (appendicitis). Perforated appendicitis (ICD-9 540.0, 540.1) were also assessed.                                                                                                                                                                                                                                                                                                                                                                                                                                                                                                                                                                                                                                                                                                                                                                                                                                             |
| Data sources/<br>measurement | 8* | For each variable of interest, give sources of data and details of methods of assessment (measurement). Describe comparability of assessment methods if there is more than one group | 3-4 | Comorbidities before the index date, including gastrointestinal disorder, infectious diseases, perinatal disorder, low birth weight or nutritional deficiency were identified by using the International Classification of Disease, Ninth Revision (ICD-9) codes with the algorithms validated in previous studies (Li et al., 2017; Sung et al., 2016). Geographic region and socioeconomic status of low-income were also added in covariate analysis. The low-income status was defined as households requiring a bailout from the government, which was registered in NHI database.                                                                                                                                                                                                                                                                                                                                                                                                                               |
| Bias                         | 9  | Describe any efforts to address potential sources of bias                                                                                                                            | 2-4 | (i) the PWP were dynamically improved by years, and the PWP differences between most areas were small (less than 10%), which may lead to misclassification bias. Therefore, we chose the areas with the highest and lowest PWP for comparison (PWP differences over 20%), so that misclassification bias could be minimized; (ii) to avoid aggregation bias from clustering case in a single sample areas, we selected study areas from each region except the eastern region, because only two counties in the eastern region and their PWP were similar. (page 2)<br>hospitalization on index date or hospitalized days before index date > 14 days, to avoid the surveillance bias of hospitalization and confoundings from disease severity.(page 4)<br>we made an alternative control cohort from the highest PWP counties in each region (Taipei County: PWP 95.10-97.34%; Yunlin County: PWP 92.89-95.19%; Tainan County: PWP 96.83-98.12%), as sensitivity analysis to test if selection bias exists.(page 4) |
| Study size                   | 10 | Explain how the study size was arrived at                                                                                                                                            | 5   | Totally 238256 patients were enrolled, with 119128 patients in each cohort.                                                                                                                                                                                                                                                                                                                                                                                                                                                                                                                                                                                                                                                                                                                                                                                                                                                                                                                                           |
| Quantitative variables       | 11 | Explain how quantitative variables were handled in the analyses. If applicable, describe which groupings were chosen and why                                                         | 4   | We also performed univariate and multivariate subgroup analyses of sex, age (in 5-year strata), geographic regions, low-income status, and comorbidity.                                                                                                                                                                                                                                                                                                                                                                                                                                                                                                                                                                                                                                                                                                                                                                                                                                                               |
| Statistical methods          | 12 | (a) Describe all statistical methods, including those used to control for confounding                                                                                                | 4   | We tested the differences in baseline characteristics between two cohorts by the standardized mean difference (SMD), while SMD > 0.1 indicates a meaningful imbalance of baseline variables. We assessed the cumulative incidence of appendicitis in both groups by the Kaplan–Meier curves and tested their differences with the log-rank test. We calculated the incidence rate (per 10000 person-years) of appendicitis for each cohort. We applied                                                                                                                                                                                                                                                                                                                                                                                                                                                                                                                                                                |

|                  |     |                                                                                                                                                                                                              |   |                                                                                                                                                                                                                                                                                                                                 |
|------------------|-----|--------------------------------------------------------------------------------------------------------------------------------------------------------------------------------------------------------------|---|---------------------------------------------------------------------------------------------------------------------------------------------------------------------------------------------------------------------------------------------------------------------------------------------------------------------------------|
|                  |     |                                                                                                                                                                                                              |   | univariable Cox proportional hazards model to estimate crude hazard ratios (HRs) and 95% confidence intervals (CIs) of the appendicitis risk in the study cohort compared to the control, and multivariate analysis to calculate adjusted hazard ratios (aHRs) after controlling for all priori-selected covariates in Table 3. |
|                  |     | (b) Describe any methods used to examine subgroups and interactions                                                                                                                                          | 4 | We also performed univariate and multivariate subgroup analyses of sex, age (in 5-year strata), geographic regions, low-income status, and comorbidity.                                                                                                                                                                         |
|                  |     | (c) Explain how missing data were addressed                                                                                                                                                                  | 9 | All participants were followed from their index date until the first date of outcome, death or the end of 2012 without missing data.                                                                                                                                                                                            |
|                  |     | (d) Cohort study—explain how loss to follow-up was addressed                                                                                                                                                 |   | No loss to follow-up                                                                                                                                                                                                                                                                                                            |
|                  |     | (e) Describe any sensitivity analyses                                                                                                                                                                        | 4 | we made an alternative control cohort from the highest PWP counties in each region (Taipei County: PWP 95.10-97.34%; Yunlin County: PWP 92.89-95.19%; Tainan County: PWP 96.83-98.12%), as sensitivity analysis to test if selection bias exists.                                                                               |
| <b>Results</b>   |     |                                                                                                                                                                                                              |   |                                                                                                                                                                                                                                                                                                                                 |
| Participants     | 13* | (a) Report numbers of individuals at each stage of study—eg numbers potentially eligible, examined for eligibility, included in the study, completing follow-up, and analysed                                | 4 | Figure 2. patient selection diagram                                                                                                                                                                                                                                                                                             |
|                  |     | (b) Give reasons for non-participation at each stage                                                                                                                                                         | 4 | Figure 2. patient selection diagram                                                                                                                                                                                                                                                                                             |
|                  |     | (c) Consider use of a flow diagram                                                                                                                                                                           | 4 | Figure 2. patient selection diagram                                                                                                                                                                                                                                                                                             |
| Descriptive data | 14* | (a) Give characteristics of study participants (eg demographic, clinical, social) and information on exposures and confounders                                                                               | 5 | Table 2. Baseline characteristics in the study and control cohorts                                                                                                                                                                                                                                                              |
|                  |     | (b) Indicate number of participants with missing data                                                                                                                                                        |   | No participants with missing data                                                                                                                                                                                                                                                                                               |
|                  |     | (c) Cohort study—Summarise follow-up time                                                                                                                                                                    | 5 | The mean follow-up time was 10.1 years in the study cohorts and 10.0 years in the control cohort.                                                                                                                                                                                                                               |
| Outcome data     | 15* | Cohort study—Report numbers of outcome events or summary measures over time                                                                                                                                  | 5 | Table 3. Comparison of incidence and HR of appendicitis between study and control cohorts                                                                                                                                                                                                                                       |
| Main results     | 16  | (a) Give unadjusted estimates and, if applicable, confounder-adjusted estimates and their precision (eg, 95% confidence interval). Make clear which confounders were adjusted for and why they were included | 5 | Table 3. Comparison of incidence and HR of appendicitis between study and control cohorts                                                                                                                                                                                                                                       |
|                  |     | (b) Report category boundaries when continuous variables were categorized                                                                                                                                    | 5 | Table 2&3                                                                                                                                                                                                                                                                                                                       |



|                   |    |                                                                                                                                                            |     |                                                                                                                                                                                                                                                                                                                                                                                                                                                                                                                                                                                                                                                                                                                                                                                                                                                                                                                                                                                                                                                                                                                                                                                                                                                                                                                                                                                                                                                                                                                                                                                                                                                                                                                                                                                                                                                                                                                                                                                                              |
|-------------------|----|------------------------------------------------------------------------------------------------------------------------------------------------------------|-----|--------------------------------------------------------------------------------------------------------------------------------------------------------------------------------------------------------------------------------------------------------------------------------------------------------------------------------------------------------------------------------------------------------------------------------------------------------------------------------------------------------------------------------------------------------------------------------------------------------------------------------------------------------------------------------------------------------------------------------------------------------------------------------------------------------------------------------------------------------------------------------------------------------------------------------------------------------------------------------------------------------------------------------------------------------------------------------------------------------------------------------------------------------------------------------------------------------------------------------------------------------------------------------------------------------------------------------------------------------------------------------------------------------------------------------------------------------------------------------------------------------------------------------------------------------------------------------------------------------------------------------------------------------------------------------------------------------------------------------------------------------------------------------------------------------------------------------------------------------------------------------------------------------------------------------------------------------------------------------------------------------------|
|                   |    | (c) If relevant, consider translating estimates of relative risk into absolute risk for a meaningful time period                                           | 5   | The overall incidence rate of appendicitis was increased in the study cohort compared to the control cohort (12.8 vs.8.7 per 1,0000 person-years), reflecting an absolute excess risk of 4.1 cases per 10000 person-years,                                                                                                                                                                                                                                                                                                                                                                                                                                                                                                                                                                                                                                                                                                                                                                                                                                                                                                                                                                                                                                                                                                                                                                                                                                                                                                                                                                                                                                                                                                                                                                                                                                                                                                                                                                                   |
| Other analyses    | 17 | Report other analyses done—eg analyses of subgroups and interactions, and sensitivity analyses                                                             | 5-7 | <p>In the subgroup analyses, most subgroups in the study cohort had higher relative risks of appendicitis than those in the control cohort. The difference of appendicitis risk between two cohorts was insignificant in the population born at 2006-2010 and with low income. The use of imaging modalities to diagnose appendicitis cases did not differ significantly between the study and control cohorts (data not shown, 29.6% vs. 32.9%, <math>p &gt; 0.05</math>), so did the proportion of perforated appendicitis cases (23.06% vs. 21.35%, <math>p &gt; 0.05</math>). But the study cohort had a consistently raised incidence rate of perforated appendicitis compared to the controls (2.95 vs. 1.86 per 10000 person-years). Figure 3 shows that the study cohort had a significant cumulative incidence of appendicitis compared to the control cohort (<math>p &lt; 0.001</math>).</p> <p>In the multivariate analysis of pediatric appendicitis risk factors (Table 4), low piped water supply was a significant risk factor for pediatric appendicitis (aHR 1.46, 95% CI 1.35-1.58, <math>p &lt; 0.001</math>). Regional risk of pediatric appendicitis also existed in the southern and central regions compared to the northern region (southern: aHR 1.78, 95% CI 1.6-1.98; central: aHR 1.77, 95% CI 1.59-1.98), with inversely related PWPs (southern: 65.17-70.70%; central: 84.60-91.36%; northern: 94.12-96.42%). Besides, we found that children born in the later years had lower risk of appendicitis. Therefore, we analyzed the crude appendicitis incidence of 0-5 years old children with different birth-year in both cohorts (Figure 4), showing a trend of decreasing incidence from 1996 to 2007 as the PWPs improved in both cohorts. The sensitivity analyses with an alternative control cohort from counties showed similar results in children with low piped water supply (aHR 1.4, 95% CI 1.29-1.51, <math>p &lt; 0.001</math>, Supplementary Table S3-S5).</p> |
| <b>Discussion</b> |    |                                                                                                                                                            |     |                                                                                                                                                                                                                                                                                                                                                                                                                                                                                                                                                                                                                                                                                                                                                                                                                                                                                                                                                                                                                                                                                                                                                                                                                                                                                                                                                                                                                                                                                                                                                                                                                                                                                                                                                                                                                                                                                                                                                                                                              |
| Key results       | 18 | Summarise key results with reference to study objectives                                                                                                   | 7   | The present study shows that children living in areas of PWP less than 80% had a higher risk of appendicitis than those living in areas of PWP over 97%, with an absolute excess risk of 4.1 cases per 10000 person-years.                                                                                                                                                                                                                                                                                                                                                                                                                                                                                                                                                                                                                                                                                                                                                                                                                                                                                                                                                                                                                                                                                                                                                                                                                                                                                                                                                                                                                                                                                                                                                                                                                                                                                                                                                                                   |
| Limitations       | 19 | Discuss limitations of the study, taking into account sources of potential bias or imprecision. Discuss both direction and magnitude of any potential bias | 8-9 | Some limitations exist in this study. First, information about diet, body mass index, smoking habits, household crowding, and genetics is lacking in TNHI database. These variables could not be adjusted in the analysis. However, smoking is rare and prohibited in children; effects of diet, household crowding, and genetics on appendicitis risk are under investigation without established conclusions. Second, piped water supply was part of urbanization process in                                                                                                                                                                                                                                                                                                                                                                                                                                                                                                                                                                                                                                                                                                                                                                                                                                                                                                                                                                                                                                                                                                                                                                                                                                                                                                                                                                                                                                                                                                                               |

Taiwan so that the areas with the highest PWPs were all cities and the areas with the lowest PWPs were all counties. The medical practice and utility may differ across cities and counties leading to confounding bias. To examine if appendicitis was diagnosed differently across regions, we scrutinized the medical records of appendicitis cases in both groups, showing no significant differences in the proportion of imaging diagnosis or perforated appendicitis related to delayed diagnosis. Besides, we performed sensitivity analyses with an alternative control cohort from counties of high PWPs, to test if unmeasured covariates between cities and counties led to selection bias. The results were consistent with previous analyses (Supplementary Table S3-S5). Therefore, we believe selection bias was minimal in this study. Third, as an indicator of WASH, piped water supply is highly correlated with other WASH interventions, such as hand washing and toilet facility. We could not obtain the exposure information of other WASH interventions for further analysis. Nevertheless, it is difficult and unreasonable to separate the influence of other WASH interventions from piped water supply on pediatric appendicitis in this study. Fourth, migration of subjects might cause misclassification bias. However, from the data of Taiwan population census in 2010, the rate to move across county or city in aged 0-14 years was lowest about 3.6% [30]. Besides, the areas of study and control cohorts were not closely adjacent (figure 1). Thus, migration of subjects is unlikely to affect our conclusion. Finally, this study is inherent to the limitation of ecological fallacy for the exposure data of piped water supply collected at group levels instead of individual levels. We could only find the inverse association between the risk of pediatric appendicitis and PWP, but unable to quantify a definite level of PWP that may prevent pediatric appendicitis in this study. The results of this study may be more applicable to public health policy than to personal risk prediction.

the incidence of pediatric appendicitis was inversely related to the PWP. Our findings were compatible with previous studies that children lacking hygiene amenities, such as piped water supply and bathroom, had a raised risk of appendicitis (Coggon et al., 1991; Gardikis et al., 2011).

the incidence of pediatric appendicitis was inversely related to the PWP. Our findings were compatible with previous studies that children lacking hygiene amenities, such as piped water supply and bathroom, had a raised risk of appendicitis (Coggon et al., 1991; Gardikis et al., 2011).

Interpretation 20 Give a cautious overall interpretation of results considering objectives, limitations, multiplicity of analyses, results from similar studies, and other relevant evidence 7

Generalisability 21 Discuss the generalisability (external validity) of the study results 7

**Other information**

Funding 22 Give the source of funding and the role of the funders for the present study and, if applicable, for the original study 9 Taiwan Ministry of Health and Welfare Clinical Trial Center (MOHW106-TDU-B-212-113004), China Medical University Hospital, Academia

---

on which the present article is based

Sinica Taiwan Biobank Stroke Biosignature Project (BM10501010037), NRPB Stroke Clinical Trial Consortium (MOST 105-2325-B-039-003), Tseng-Lien Lin Foundation, Taichung, Taiwan, Taiwan Brain Disease Foundation, Taipei, Taiwan, and Katsuzo and Kiyo Aoshima Memorial Funds, Japan. The funders had no role in the study design, data collection and analysis, decision to publish, or preparation of the manuscript. No additional external funding was received for this study.

---

\*Give information separately for cases and controls in case-control studies and, if applicable, for exposed and unexposed groups in cohort and cross-sectional studies.

**Note:** An Explanation and Elaboration article discusses each checklist item and gives methodological background and published examples of transparent reporting. The STROBE checklist is best used in conjunction with this article (freely available on the Web sites of PLoS Medicine at <http://www.plosmedicine.org/>, Annals of Internal Medicine at <http://www.annals.org/>, and Epidemiology at <http://www.epidem.com/>). Information on the STROBE Initiative is available at [www.strobe-statement.org](http://www.strobe-statement.org).
